# Supplementary material
Source: Elsevier journal article supplement (https://rcastoragev2.blob.core.windows.net/10785360eb41761ee773f8bbc41af06b/mmc1.pdf)
Supplement: mmc1 [file mmc1.pdf]

# THE LANCET

## Respiratory Medicine

### **Supplementary appendix**

This appendix formed part of the original submission and has been peer reviewed. We post it as supplied by the authors.

Supplement to: Hoeper MM, Dwivedi K, Pausch C, et al. Phenotyping of idiopathic pulmonary arterial hypertension: a registry analysis. *Lancet Respir Med* 2022; published online June 28. [https://doi.org/10.1016/S2213-2600\(22\)00097-2](https://doi.org/10.1016/S2213-2600(22)00097-2).

**Phenotyping of idiopathic pulmonary arterial hypertension: a registry analysis**

Supplementary material

**Content**

|        |                                                                                                                                                                                                               |
|--------|---------------------------------------------------------------------------------------------------------------------------------------------------------------------------------------------------------------|
| Page 2 | Table S1a: Number of available data for each variable in COMPERA                                                                                                                                              |
| Page 4 | Table S1b: Number of available data for each variable in ASPIRE                                                                                                                                               |
| Page 6 | Table S2a: COMPERA baseline characteristics of patients with IPAH excluded from the analysis (i.e., patients belonging neither to classical IPAH nor to the group of patients with IPAH and a lung phenotype) |
| Page 8 | Table S2b: ASPIRE baseline characteristics of patients with IPAH excluded from the analysis                                                                                                                   |

19 **Table S1a: Number of available data for each variable in COMPERA**

20

|                           | Classical IPAH<br>n=128 | IPAH with a<br>pulmonary<br>phenotype<br>n=268 | Group 3 PH<br>n=910 |
|---------------------------|-------------------------|------------------------------------------------|---------------------|
| Age, years                | 128 (100%)              | 268 (100%)                                     | 910 (100%)          |
| Female                    | 128 (100%)              | 268 (100%)                                     | 910 (100%)          |
| BMI, kg/m <sup>2</sup>    | 128 (100%)              | 268 (100%)                                     | 858 (94%)           |
| WHO FC                    | 126 (98%)               | 251 (94%)                                      | 867 (95%)           |
| 6MWD, m                   | 111 (87%)               | 195 (73%)                                      | 662 (73%)           |
| NT-proBNP, ng/L           | 98 (77%)                | 197 (74%)                                      | 532 (59%)           |
| BNP, ng/L                 | 15 (12%)                | 33 (12%)                                       | 180 (20%)           |
| Pulmonary function        |                         |                                                |                     |
| TLC, % pred               | 103 (81%)               | 228 (85%)                                      | 734 (81%)           |
| FVC, % pred               | 113 (88%)               | 235 (88%)                                      | 884 (93%)           |
| FEV <sub>1</sub> , % pred | 111 (87%)               | 237 (88%)                                      | 855 (94%)           |
| FEV <sub>1</sub> /FVC (%) | 102 (80%)               | 222 (83%)                                      | 724 (80%)           |
| DLCO, % pred              | 128 (100%)              | 268 (100%)                                     | 578 (64%)           |
| PaO <sub>2</sub> , mmHg   | 105 (82%)               | 225 (84%)                                      | 828 (91%)           |
| PaCO <sub>2</sub> , mmHg  | 107 (84%)               | 223 (83%)                                      | 825 (91%)           |
| Smoking history           | 116 (91%)               | 268 (100%)                                     | 262 (29%)           |
| If ever:                  |                         |                                                |                     |
| Pack years                | 27 (68%)                | 194 (72%)                                      | 189 (89%)           |
| Comorbid conditions       |                         |                                                |                     |
| BMI >30 kg/m <sup>2</sup> | 128 (100%)              | 268 (100%)                                     | 858 (94%)           |
| Hypertension              | 128 (100%)              | 262 (98%)                                      | 750 (82%)           |
| Coronary heart disease    | 128 (100%)              | 262 (98%)                                      | 731 (80%)           |
| Diabetes mellitus         | 128 (100%)              | 261 (97%)                                      | 751 (83%)           |
| Atrial fibrillation       | 119 (93%)               | 257 (96%)                                      | 853 (94%)           |
| Haemodynamics             |                         |                                                |                     |
| RAP, mmHg                 | 113 (88%)               | 229 (85%)                                      | 837 (92%)           |
| mPAP, mmHg                | 128 (100%)              | 268 (100%)                                     | 910 (100%)          |
| PAWP, mmHg                | 128 (100%)              | 268 (100%)                                     | 910 (100%)          |
| CI, L/min/m <sup>2</sup>  | 122 (95%)               | 252 (94%)                                      | 861 (95%)           |
| PVR, WU                   | 128 (100%)              | 268 (100%)                                     | 910 (100%)          |
| SvO <sub>2</sub> , %      | 111 (87%)               | 216 (81%)                                      | 780 (86%)           |
| Risk                      | 128 (100%)              | 266 (99%)                                      | 898 (99%)           |

|            |            |           |           |
|------------|------------|-----------|-----------|
| Medication | 128 (100%) | 266 (99%) | 898 (99%) |
|------------|------------|-----------|-----------|

21

22

23 Data are shown as n and % of the respective population.

24 *Definition of abbreviations:* BMI, body mass index; IPAH, idiopathic pulmonary arterial

25 hypertension; PH, pulmonary hypertension; WHO FC, World Health Organization Functional

26 Class; 6MWD, 6-minute walking distance; NT-proBNP, N-terminal fragment of pro-brain

27 natriuretic peptide; TLC, total lung capacity; FVC, forced vital capacity; FEV<sub>1</sub>, forced

28 expiratory volume in 1 s; DLCO, diffusion capacity of the lung for carbon monoxide; RA, right

29 atrial pressure; mPAP, mean pulmonary arterial pressure; PAWP, pulmonary arterial wedge

30 pressure; CI, cardiac index; PVR, pulmonary vascular resistance; SvO<sub>2</sub>, mixed-venous oxygen

31 saturation.

**Table S1b: Number of available data for each variable in ASPIRE**

|                             | Classical IPAH (i)<br>n=185 | IPAH with a lung<br>phenotype (ii)<br>n=139 | Group 3.1 or 3.2<br>PH<br>n=375 (iii) |
|-----------------------------|-----------------------------|---------------------------------------------|---------------------------------------|
| Age, years                  | 185 (100%)                  | 139 (100%)                                  | 375 (100%)                            |
| Female                      | 185 (100%)                  | 139 (100%)                                  | 375 (100%)                            |
| BMI, kg/m <sup>2</sup>      | 178 (96%)                   | 133 (96%)                                   | 358 (95%)                             |
| WHO FC                      | 185 (100%)                  | 139 (100%)                                  | 372 (99%)                             |
| ISWD, m                     | 181 (98%)                   | 121 (87%)                                   | 353 (94%)                             |
| Pulmonary function          |                             |                                             |                                       |
| FEV <sub>1</sub> , % pred   | 183 (99%)                   | 139 (100%)                                  | 345 (92%)                             |
| FVC, % pred                 | 183 (99%)                   | 139 (100%)                                  | 344 (92%)                             |
| FEV <sub>1</sub> /FVC (%)   | 183 (99%)                   | 139 (100%)                                  | 345 (92%)                             |
| DLCO, % pred                | 185 (100%)                  | 139 (100%)                                  | 302 (81%)                             |
| Smoking history             | 168 (91%)                   | 139 (100%)                                  | 0 (0%)                                |
| If ever:                    |                             |                                             |                                       |
| Pack years                  | 36 (47%)                    | 97 (70%)                                    | 0 (0%)                                |
| Haemodynamics               |                             |                                             |                                       |
| RAP, mmHg                   | 183 (99%)                   | 138 (99%)                                   | 373 (99%)                             |
| mPAP, mmHg                  | 185 (100%)                  | 139 (100%)                                  | 375 (100%)                            |
| PAWP, mmHg                  | 185 (100%)                  | 139 (100%)                                  | 375 (100%)                            |
| CI, L/min/m <sup>2</sup>    | 178 (96%)                   | 131 (94%)                                   | 368 (98%)                             |
| PVR, WU                     | 185 (100%)                  | 139 (100%)                                  | 375 (100%)                            |
| SvO <sub>2</sub> , %        | 168 (91%)                   | 125 (90%)                                   | 347 (93%)                             |
| Computed Tomography<br>(CT) |                             |                                             |                                       |
| CT report available         | 109 (59%)                   | 86 (62%)                                    | 219 (58%)                             |
| Fibrosis                    | 109 (59%)                   | 86 (62%)                                    | 219 (58%)                             |
| Fibrosis severity           | 107 (58%)                   | 85 (61%)                                    | 207 (55%)                             |
| Emphysema                   | 109 (59%)                   | 86 (62%)                                    | 219 (58%)                             |
| Emphysema severity          | 106 (57%)                   | 85 (61%)                                    | 210 (56%)                             |
| Medication                  | 167 (90%)                   | 138 (99%)                                   | 375 (100%)                            |

Data are shown as n and % of the respective population.

*Definition of abbreviations:* BMI, body mass index; IPAH, idiopathic pulmonary arterial hypertension; PH, pulmonary hypertension; WHO FC, World Health Organization Functional Class; ISWD, incremental shuttle walk distance; FVC, forced vital capacity; FEV<sub>1</sub>, forced expiratory volume in 1 s; DLCO, diffusion capacity of the lung for carbon monoxide; RA, right atrial pressure; mPAP, mean pulmonary arterial pressure; PAWP, pulmonary arterial wedge pressure; CI, cardiac index; PVR, pulmonary vascular resistance; SvO<sub>2</sub>, mixed-venous oxygen saturation.

**Table S2a: COMPERA baseline characteristics of patients with IPAH excluded from the analysis (i.e., patients belonging neither to classical IPAH nor to the group of patients with IPAH and a lung phenotype)**

|                           | Excluded IPAH patients<br>n=1,406 |
|---------------------------|-----------------------------------|
| Age, years                | 72 [60, 78]                       |
| Female                    | 880 (63%)                         |
| BMI, kg/m <sup>2</sup>    | 28 [25, 33]                       |
| WHO FC                    |                                   |
| I                         | 4 (0.3%)                          |
| II                        | 189 (14%)                         |
| III                       | 941 (71%)                         |
| IV                        | 197 (15%)                         |
| 6MWD, m                   | 300 [200, 376]                    |
| NT-proBNP, ng/L           | 1641 [615, 3674]                  |
| BNP, ng/L                 | 209 [102, 461]                    |
| Pulmonary function        |                                   |
| TLC, % pred               | 92 [80, 102]                      |
| FVC, % pred               | 80 [65, 93]                       |
| FEV <sub>1</sub> , % pred | 75 [62, 91]                       |
| DLCO, % pred              | 54 [40, 71]                       |
| PaO <sub>2</sub> , mmHg   | 64 [57, 73]                       |
| PaCO <sub>2</sub> , mmHg  | 36 [32, 40]                       |
| Smoking history           |                                   |
| Ever                      | 302 (35%)                         |
| Never                     | 566 (65%)                         |
| Pack years                | 25 [14, 40]                       |
| Comorbid conditions       |                                   |
| BMI >30 kg/m <sup>2</sup> | 538 (39%)                         |
| Hypertension              | 900 (74%)                         |
| Coronary heart disease    | 355 (30%)                         |
| Diabetes mellitus         | 412 (34%)                         |
| Atrial fibrillation       | 303 (24%)                         |
| Haemodynamics             |                                   |
| RAP, mmHg                 | 8 [5, 11]                         |
| mPAP, mmHg                | 42 [34, 51]                       |

|                                                                                                |                                                                                         |
|------------------------------------------------------------------------------------------------|-----------------------------------------------------------------------------------------|
| PAWP, mmHg<br>CI, L/min/m <sup>2</sup><br>PVR, WU<br>SvO <sub>2</sub> , %                      | 10 [7, 12]<br>2·1 [1·7, 2·6]<br>8·1 [5·7, 11·7]<br>63 [57, 68]                          |
| Risk (4-strata model) <sup>a</sup><br>Low<br>Intermediate-low<br>Intermediate-high<br>High     | 88 (6%)<br>241 (17%)<br>697 (50%)<br>365 (26%)                                          |
| PH medications<br>CCB<br>ERA<br>PDE5i<br>sGCs<br>PPA<br><br>Monotherapy<br>Combination therapy | 71 (5%)<br>413 (29%)<br>1103 (78%)<br>54 (4%)<br>39 (3%)<br><br>1149 (82%)<br>257 (18%) |

Categorical data are shown as n and % of the respective population. Continuous data are depicted as median [Q1, Q3].

*Definition of abbreviations:* BMI, body mass index; IPAH, idiopathic pulmonary arterial hypertension; PH, pulmonary hypertension; WHO FC, World Health Organization Functional Class; 6MWD, 6-minute walking distance; NT-proBNP, N-terminal fragment of pro-brain natriuretic peptide; TLC, total lung capacity; FVC, forced vital capacity; FEV<sub>1</sub>, forced expiratory volume in 1 s; DLCO, diffusion capacity of the lung for carbon monoxide; RA, right atrial pressure; mPAP, mean pulmonary arterial pressure; PAWP, pulmonary arterial wedge pressure; CI, cardiac index; PVR, pulmonary vascular resistance; SvO<sub>2</sub>, mixed-venous oxygen saturation; CCB, calcium channel blocker; ERA endothelin receptor antagonists; PDE5i, phosphodiesterase-5 inhibitors; sGCs, stimulator of soluble guanylate cyclase; PPA, prostacyclin pathway agents.

62 **Table S2b: ASPIRE baseline characteristics of patients with IPAH excluded from the analysis**

63

|                              | Excluded IPAH patients<br>n=148 |
|------------------------------|---------------------------------|
| Age, years                   | 69 [60, 77]                     |
| Female                       | 78 (53%)                        |
| BMI, kg/m <sup>2</sup>       | 28.4 [24.3, 32.6]               |
| WHO FC                       |                                 |
| I                            | 0 (0%)                          |
| II                           | 15 (10%)                        |
| III                          | 80 (54%)                        |
| IV                           | 52 (35%)                        |
| ISWD, m                      | 80 [20, 180]                    |
| Pulmonary function           |                                 |
| FVC, % pred                  | 93 [75, 101]                    |
| FEV <sub>1</sub> , % pred    | 78 [61, 90]                     |
| FEV <sub>1</sub> / FVC Ratio | 70 [62, 76]                     |
| DLCO, % pred                 | 30 [23, 36]                     |
| Smoking history              |                                 |
| Ever                         | 28 (33%)                        |
| Never                        | 56 (67%)                        |
| Pack years                   | 25 [20, 30]                     |
| Haemodynamics                |                                 |
| RAP, mmHg                    | 11.0 [8.0, 15.0]                |
| mPAP, mmHg                   | 50 [45, 58]                     |
| PAWP, mmHg                   | 11.0 [8.0, 13.0]                |
| CI, L/min/m <sup>2</sup>     | 2.1 [1.8, 2.7]                  |
| PVR, WU                      | 9.9 [7.4, 12.9]                 |
| SvO <sub>2</sub> , %         | 61 [55, 66]                     |
| CT report available          | 80 (54%)                        |
| Fibrosis (any present)       | 28 (35%)                        |
| Fibrosis (by severity)       |                                 |
| None                         | 52 (68%)                        |
| Mild                         | 22 (29%)                        |
| Moderate                     | 3 (3.9%)                        |
| Severe                       | 0 (0%)                          |
| Emphysema (any present)      | 24 (30%)                        |

|                         |          |
|-------------------------|----------|
| Emphysema (by severity) |          |
| None                    | 56 (71%) |
| Mild                    | 10 (13%) |
| Moderate                | 11 (14%) |
| Severe                  | 2 (2.5%) |
| Treatment*              |          |
| None                    | 0 (0%)   |
| CCB                     | 1 (1%)   |
| Oral monotherapy        | 50 (36%) |
| Oral combination        | 65 (46%) |
| PPA ± oral therapy      | 24 (17%) |

Categorical data are shown as n and % of the respective population. Continuous data are depicted as median [Q1, Q3].

*Definition of abbreviations:* BMI, body mass index; IPAH, idiopathic pulmonary arterial hypertension; PH, pulmonary hypertension; WHO FC, World Health Organization Functional Class; ISWD, incremental shuttle walk distance; FVC, forced vital capacity; FEV<sub>1</sub>, forced expiratory volume in 1 s; DLCO, diffusion capacity of the lung for carbon monoxide; RA, right atrial pressure; mPAP, mean pulmonary arterial pressure; PAWP, pulmonary arterial wedge pressure; CI, cardiac index; PVR, pulmonary vascular resistance; SvO<sub>2</sub>, mixed-venous oxygen saturation; CT, computed tomography; CCB, calcium channel blocker; ERA endothelin receptor antagonists; PDE5i, phosphodiesterase-5 inhibitors; sGCs, stimulator of soluble guanylate cyclase; PPA, prostacyclin pathway agents.

\*Oral monotherapy includes PDE5i or ERA or SGCs; oral combination includes ERA in combination with PDE5i or SGCs; PPA +/- oral therapy includes prostanoids either alone or in combination with PDE5i or sGCs +/- ERA.
